# Supplementary material for: A critical review on Li-ion transport, chemistry and structure of ceramic–polymer composite electrolytes for solid state batteries
Source: Royal Society of Chemistry journal article supplement (doi:10.1039/d4cs00214h), 2024-11-18
Supplement: d4cs00214h1.pdf [file d4cs00214h1.pdf]

Supplemental Information:

| Authors             | Date       | Cathode Material                  | Anode Material                                  | Voltage Range | Cycling Rate | Cycling Temperature (°C) | Capacity (mAh/g) | Capacity Retention     |     |
|---------------------|------------|-----------------------------------|-------------------------------------------------|---------------|--------------|--------------------------|------------------|------------------------|-----|
| Zhao <i>et al.</i>  | June 2016  | LiFePO <sub>4</sub>               | Li                                              | 3.0-3.8V      | 0.5C         | 60                       | 148.6            | 92.5% after 50cycles   | 124 |
| Zhao <i>et al.</i>  | May 2016   | LiFePO <sub>4</sub>               | Li                                              | 3.0-3.8V      | 1C           | 60                       | 108              | 90% after 50 cycles    | 45  |
| Zhang <i>et al.</i> | Jan 2017   | LiFePO <sub>4</sub>               | Li                                              | 2.5-4.0 V     | 1C           | 20                       | 127              | 95% after 200 cycles   | 64  |
| Zhang <i>et al.</i> | Sept 2017  | LiCoO <sub>2</sub> -based cathode | Li                                              | 3.0- 4.2V     | 0.4C         | 20                       | 150              | 98% after 120 cycles   | 42  |
| Cheng <i>et al.</i> | May 2017   | LiFePO <sub>4</sub>               | Li                                              | 2.5-4.0 V     | 1C           | 60                       | 140              | 83% after 500 cycles   | 125 |
| Zhang <i>et al.</i> | Nov 2017   | LiFePO <sub>4</sub>               | Li <sub>4</sub> Ti <sub>5</sub> O <sub>12</sub> | 2.5-4.0 V     | 1C           | RT                       | 100              | 95% after 200cycles    | 64  |
| Zhao <i>et al.</i>  | Oct 2017   | LiFePO <sub>4</sub>               | Li                                              | 2.5-3.8 V     | 0.1C         | 60                       | 150              | 13% after 100 cycles   | 126 |
| Li <i>et al.</i>    | Feb 2018   | LiFePO <sub>4</sub>               | Li                                              | 2.9-3.8V      | 0.2C         | 60                       | 144              | 99.5% after 100 cycles | 40  |
| Lin <i>et al.</i>   | April 2018 | LiFePO <sub>4</sub>               | Li                                              | 2.5-4.0 V     | 0.5C         | 18                       | 105              | 92% after 200 cycles   | 76  |
| Yao <i>et al.</i>   | April 2018 | NMC                               | Li                                              | 3.0-4.2V      | 0.3C         | RT                       | 121              | 98.5% after 200 cycles | 127 |
| Wang <i>et al.</i>  | June 2019  | LiFePO <sub>4</sub>               | Li                                              | 2.5-3.8V      | 0.6C         | 60                       | 139              | 87.4% after 400 cycles | 44  |
| Chen <i>et al.</i>  | Feb 2019   | LiFePO <sub>4</sub>               | Li                                              | 2.5-4.2V      | 0.5C         | 25                       | 146              | 92% after 200cycles    | 41  |
| Huo <i>et al.</i>   | Jan 2019   | LiFePO <sub>4</sub>               | Li                                              | 2.8-3.8V      | 1C           | 60                       | 106              | 85.4% after 300cycles  | 128 |

|                       |           |                                    |          |          |       |    |     |                                        |     |
|-----------------------|-----------|------------------------------------|----------|----------|-------|----|-----|----------------------------------------|-----|
| Lu <i>et al.</i>      | Jan 2019  | LiFePO <sub>4</sub>                | Li       | 2.7-4.2V | 0.5C  | 25 | 101 | Retained full capacity after 500cycles | 96  |
| Pan <i>et al.</i>     | Sept 2019 | LiFePO <sub>4</sub>                | Li       | 2-5V     | 0.33C | 60 | 140 | 91.4% after 100cycles                  | 56  |
| Sun <i>et al.</i>     | Jan 2019  | LiFePO <sub>4</sub>                | Li       | 2.8-4.0V | 0.2C  | 60 | 161 | 97.3% after 100cycles                  | 129 |
| Tang <i>et al.</i>    | Jan 2019  | LiFePO <sub>4</sub>                | Li       | 2.5-3.8V | 0.5C  | 35 | 133 | 82% after 200cycles                    | 130 |
| Sivaraj <i>et al.</i> | Feb 2020  | Li <sub>2</sub> FeSiO <sub>4</sub> | graphite | 2.5-3.8V | 0.6C  | 60 | 87  | 85% after 30cycles                     | 27  |

Table S2

| Authors                  | Date      | Ionic conductivity (S/cm) at RT | Structure       | Ceramic Material                                                                      | Polymer | Lithium Salt                      | Scale (nm) | Polymer Ionic conductivity at RT (S/cm) |     |
|--------------------------|-----------|---------------------------------|-----------------|---------------------------------------------------------------------------------------|---------|-----------------------------------|------------|-----------------------------------------|-----|
| *Capuano <i>et al.</i>   | July 1991 | $1.1 \times 10^{-6}$            | Particles       | LiAlO <sub>2</sub>                                                                    | PEO     | LiClO <sub>4</sub>                | 500        | $1 \times 10^{-8}$                      | 36  |
| Kumar <i>et al.</i>      | Dec 1994  | $2 \times 10^{-6}$              | Particles       | Li <sub>3</sub> N                                                                     | PEO     | LiBF <sub>4</sub>                 | --         | --                                      | 80  |
| *Nairn <i>et al.</i>     | July 1996 | $1 \times 10^{-4}$              | Particles       | LATP                                                                                  | 3PEG    | LiCF <sub>3</sub> SO <sub>3</sub> | --         | --                                      | 70  |
| *Croce <i>et al.</i>     | July 1998 | $2 \times 10^{-5}$              | Inert Particles | TiO <sub>2</sub>                                                                      | PEO     | LiClO <sub>4</sub>                | 10         | $1 \times 10^{-8}$                      | 69  |
|                          |           | $5 \times 10^{-6}$              | Inert Particles | Al <sub>2</sub> O <sub>3</sub>                                                        | PEO     | LiClO <sub>4</sub>                | 10         | $1 \times 10^{-8}$                      |     |
| Appetecchi <i>et al.</i> | Dec 1998  | $5 \times 10^{-7}$              | Particles       | LiAlO <sub>2</sub>                                                                    | PEO     | LiBF <sub>4</sub>                 | 4000       | $1 \times 10^{-7}$                      | 131 |
| Appetecchi <i>et al.</i> | Jan 1999  | $3 \times 10^{-7}$              | Particles       | LiAlO <sub>2</sub>                                                                    | PEO     | LiBF <sub>4</sub>                 | 100000     | --                                      | 132 |
| *Croce <i>et al.</i>     | Dec 1999  | $2 \times 10^{-5}$              | Inert Particles | TiO <sub>2</sub>                                                                      | PEO     | LiClO <sub>4</sub>                | 13         | $5 \times 10^{-8}$                      | 68  |
|                          |           | $1.5 \times 10^{-5}$            | Inert Particles | Al <sub>2</sub> O <sub>3</sub>                                                        | PEO     | LiClO <sub>4</sub>                | 6          | $5 \times 10^{-8}$                      |     |
| Croce <i>et al.</i>      | Nov 2000  | $3 \times 10^{-7}$              | Particles       | LiAl <sub>2</sub> O                                                                   | PEO     | LiBF <sub>4</sub>                 | 4000       | $7 \times 10^{-8}$                      | 133 |
|                          |           | $2.9 \times 10^{-6}$            | Particles       | LiAl <sub>2</sub> O                                                                   | PEO     | LiCF <sub>3</sub> SO <sub>3</sub> | 4000       | $7 \times 10^{-8}$                      |     |
|                          |           | $1 \times 10^{-5}$              | Inert Particles | Al <sub>2</sub> O <sub>3</sub>                                                        | PEO     | LiClO <sub>4</sub>                | 6          | $7 \times 10^{-8}$                      |     |
|                          |           | $2.3 \times 10^{-5}$            | Inert Particles | TiO <sub>2</sub>                                                                      | PEO     | LiClO <sub>4</sub>                | 13         | $7 \times 10^{-8}$                      |     |
| Croce <i>et al.</i>      | May 2001  | $2.1 \times 10^{-5}$            | Inert Particles | Al <sub>2</sub> O <sub>3</sub>                                                        | PEO     | LiCF <sub>3</sub> SO <sub>3</sub> | 6          | $1 \times 10^{-7}$                      | 77  |
| Chung <i>et al.</i>      | July 2001 | $6 \times 10^{-6}$              | Inert Particles | TiO <sub>2</sub>                                                                      | PEO     | LiClO <sub>4</sub>                | 11         | $7 \times 10^{-8}$                      | 134 |
|                          |           | $7 \times 10^{-6}$              | Inert Particles | Al <sub>2</sub> O <sub>3</sub>                                                        | PEO     | LiClO <sub>4</sub>                | 6          | $7 \times 10^{-8}$                      |     |
| Ikeda <i>et al.</i>      | July 2001 | $3.3 \times 10^{-6}$            | Particles       | Li <sub>2</sub> S-<br>SiS <sub>2</sub> -<br>Li <sub>4</sub> SiO <sub>4</sub><br>glass | POE     | None                              | 7000       | --                                      | 135 |
| *Chen <i>et al.</i>      | July 2001 | $1.6 \times 10^{-4}$            | Inert Particles | clay                                                                                  | PEO     | LiCF <sub>3</sub> SO <sub>3</sub> | 2          | $5.6 \times 10^{-7}$                    | 67  |
| Hayashi <i>et al.</i>    | Aug 2001  | $3 \times 10^{-5}$              | Particles       | Li <sub>4</sub> SiO <sub>4</sub>                                                      | POE     | LiClO <sub>4</sub>                | 2000       | --                                      | 136 |
| Kohjiya <i>et al.</i>    | Dec 2002  | $3 \times 10^{-5}$              | Particles       | Li <sub>2</sub> S-<br>SiS <sub>2</sub> -<br>Li <sub>4</sub> SiO <sub>4</sub><br>glass | POE     | LiClO <sub>4</sub>                | 2000       | --                                      | 137 |

|                           |            |                      |                      |                                               |      |                                                   |         |                      |     |
|---------------------------|------------|----------------------|----------------------|-----------------------------------------------|------|---------------------------------------------------|---------|----------------------|-----|
| Dissanayake <i>et al.</i> | June 2003  | $7 \times 10^{-5}$   | Inert Particles      | $\text{Al}_2\text{O}_3$                       | PEO  | $\text{LiCF}_3\text{SO}_3$                        | 6       | $4 \times 10^{-7}$   | 62  |
|                           |            | $9.9 \times 10^{-6}$ | Inert Particles      | $\text{Al}_2\text{O}_3$                       | PEO  | $\text{LiCF}_3\text{SO}_3$                        | 37      | $8 \times 10^{-7}$   |     |
| Fan <i>et al.</i>         | Oct 2003   | $5 \times 10^{-6}$   | Inert Particles      | $\text{SiO}_2$                                | PEO  | $\text{LiClO}_4$                                  | 10      | $2 \times 10^{-7}$   | 75  |
| Ikeda <i>et al.</i>       | Nov 2004   | $1.6 \times 10^{-6}$ | Particles            | $\text{Li}_4\text{B}_7\text{O}_{12}\text{Cl}$ | PEG  | $\text{LiN}(\text{SO}_2\text{CF}_3)_2$            | 100000  | --                   | 138 |
| *Wang <i>et al.</i>       | Dec 2004   | $5 \times 10^{-5}$   | Wires and Fiber Mats | LLT                                           | PEO  | $\text{LiN}(\text{SO}_2\text{CF}_2\text{CF}_3)_2$ | 250,000 | --                   | 71  |
|                           |            | $1.5 \times 10^{-4}$ | Wires and Fiber Mats | LLT                                           | PEO  | $\text{LiN}(\text{SO}_2\text{CF}_2\text{CF}_3)_2$ | 15000   |                      |     |
| *Kumar <i>et al.</i>      | July 2010  | $4 \times 10^{-4}$   | Particles            | $\text{Li}_2\text{O}$                         | PEO  | LiBETI                                            | --      | $2 \times 10^{-4}$   | 66  |
| Choi <i>et al.</i>        | Jan 2015   | $1 \times 10^{-5}$   | Inert Particles      | $\text{Al}_2\text{O}_3$                       | PEO  | $\text{LiClO}_4$                                  | 100     | $7 \times 10^{-8}$   | 91  |
|                           |            | $1 \times 10^{-5}$   | Particles            | LLZO                                          | PEO  | $\text{LiClO}_4$                                  | 750     | $7 \times 10^{-8}$   |     |
| *Liu <i>et al.</i>        | April 2015 | $2 \times 10^{-5}$   | Wires                | LLTO                                          | PAN  | $\text{LiClO}_4$                                  | 140     | $5 \times 10^{-9}$   | 35  |
| Jung <i>et al.</i>        | Feb 2015   | $1.5 \times 10^{-5}$ | Particles            | LAGP                                          | PEO  | $\text{LiClO}_4$                                  | 7000    | $4 \times 10^{-7}$   | 139 |
|                           |            | $7.2 \times 10^{-7}$ | Inert Particles      | $\text{Al}_2\text{O}_3$                       | PEO  | $\text{LiClO}_4$                                  | 3       | $4 \times 10^{-7}$   |     |
| Zhao <i>et al.</i>        | Nov 2016   | $5 \times 10^{-5}$   | Particles            | LAGP                                          | PEO  | LiTFSI                                            | 500     | $6 \times 10^{-6}$   | 45  |
|                           |            | $2.5 \times 10^{-5}$ | Particles            | LAGP                                          | PEO  | LiTFSI                                            | 30000   | $6 \times 10^{-6}$   |     |
| *Fu <i>et al.</i>         | June 2016  | $2.5 \times 10^{-4}$ | Wires                | Al-LLZO                                       | PEO  | LiTFSI                                            | 256     | $1 \times 10^{-7}$   | 86  |
| *Zhang <i>et al.</i>      | Jan 2017   | $3.2 \times 10^{-4}$ | Particles            | $\text{SiO}_2$                                | PPC  | LiTFSI                                            | --      | $3.9 \times 10^{-4}$ | 64  |
|                           |            | $3.3 \times 10^{-4}$ | Particles            | $\text{Al}_2\text{O}_3$                       | PPC  | LiTFSI                                            | --      | $3.9 \times 10^{-4}$ |     |
|                           |            | $3.8 \times 10^{-4}$ | Particles            | $\text{TiO}_2$                                | PPC  | LiTFSI                                            | --      | $3.9 \times 10^{-4}$ |     |
|                           |            | $5.2 \times 10^{-4}$ | Particles            | LLZTO                                         | PPC  | LiTFSI                                            | 30      | $3.9 \times 10^{-4}$ |     |
| Wang <i>et al.</i>        | Feb 2017   | $1.7 \times 10^{-4}$ | Particles            | LATP                                          | PEO  | $\text{LiClO}_4$                                  | 65      | $2 \times 10^{-8}$   | 43  |
| Buvana <i>et al.</i>      | Mar 2017   | $2 \times 10^{-4}$   | Particles            | LLBTO                                         | PEO  | $\text{LiClO}_4$                                  | 2000    | --                   | 115 |
| Liu <i>et al.</i>         | April 2017 | $1 \times 10^{-6}$   | Particles            | LLTO                                          | PAN  | $\text{LiClO}_4$                                  | --      | $3.6 \times 10^{-7}$ | 38  |
|                           |            | $5.4 \times 10^{-6}$ | Wires                | LLTO                                          | PAN  | $\text{LiClO}_4$                                  | 138     | $3.6 \times 10^{-7}$ |     |
|                           |            | $6.0 \times 10^{-5}$ | Aligned Wires        | LLTO                                          | PAN  | $\text{LiClO}_4$                                  | 138     | $3.6 \times 10^{-7}$ |     |
| Safanama <i>et al.</i>    | April 2017 | $1 \times 10^{-4}$   | Particles            | LAGP                                          | PEO  | $\text{LiBF}_4$                                   | 3000    | --                   | 140 |
| Yang <i>et al.</i>        | July 2017  | $1 \times 10^{-4}$   | Wires                | LLZO                                          | PAN  | $\text{LiClO}_4$                                  | 223     | $4 \times 10^{-7}$   | 84  |
| *Zhang <i>et al.</i>      | Sept 2017  | $5 \times 10^{-4}$   | Particles            | LLZTO                                         | PVDF | $\text{LiClO}_4$                                  | 30      | --                   | 42  |
| Zhao <i>et al.</i>        | Oct 2017   | $1 \times 10^{-5}$   | Particles            | LLZTO                                         | PEO  | LiTFSI                                            | 8700    | --                   | 126 |

|                         |            |                      |                               |                                 |              |                    |        |                      |     |
|-------------------------|------------|----------------------|-------------------------------|---------------------------------|--------------|--------------------|--------|----------------------|-----|
| Cheng <i>et al.</i>     | Nov 2017   | $3.1 \times 10^{-6}$ | Particles                     | LLZTO                           | PEO          | LiClO <sub>4</sub> | 1400   | $3 \times 10^{-7}$   | 125 |
| Chen <i>et al.</i>      | Dec 2017   | $7.5 \times 10^{-5}$ | Particles                     | LLZO                            | PEO/<br>PEG  | LiTFSI             | 10000  | $1 \times 10^{-5}$   | 94  |
| *Bae <i>et al.</i>      | Feb 2018   | $9 \times 10^{-5}$   | Other                         | LLTO                            | PEO          | LiTFSI             | 150    | $2 \times 10^{-6}$   | 28  |
| Mohapatra <i>et al.</i> | Mar 2018   | $3 \times 10^{-5}$   | Inert Particles               | CeO <sub>2</sub>                | PEO          | LiClO <sub>4</sub> | 25     | $3 \times 10^{-7}$   | 78  |
| Xie <i>et al.</i>       | Mar 2018   | $1.1 \times 10^{-4}$ | Wires                         | LLZO                            | PEO          | LiTFSI             | 750    | $1 \times 10^{-6}$   | 87  |
| Chen <i>et al.</i>      | April 2018 | $7.8 \times 10^{-5}$ | Particles                     | LLZTO                           | PEO          | LiTFSi             | 6500   | $4.6 \times 10^{-5}$ | 90  |
| Ban <i>et al.</i>       | May 2018   | $9.4 \times 10^{-6}$ | Particles                     | LATP                            | PEO          | LiClO <sub>4</sub> | 150    | $1 \times 10^{-6}$   | 141 |
| *Zhang <i>et al.</i>    | June 2018  | $5.8 \times 10^{-4}$ | Inert<br>Columnar<br>holes    | Al <sub>2</sub> O <sub>3</sub>  | PEO          | LiTFSI             | 200    | $6 \times 10^{-6}$   | 63  |
| Lin <i>et al.</i>       | Aug 2018   | $5.5 \times 10^{-4}$ | Inert<br>Connected<br>Network | SiO <sub>2</sub>                | PEO          | LiTFSI             | 20     | $1.8 \times 10^{-4}$ | 76  |
| Karthik <i>et al.</i>   | Oct 2018   | $4.4 \times 10^{-4}$ | Particles                     | Al-LLZO                         | PEO          | LiClO <sub>4</sub> | 343    | --                   | 85  |
| Chen <i>et al.</i>      | Nov 2018   | $3.4 \times 10^{-5}$ | Particles                     | LLZO                            | PEO          | LiTFSI             | 25000  | $2.9 \times 10^{-6}$ | 142 |
| Huo <i>et al.</i>       | Mar 2019   | $3.1 \times 10^{-5}$ | Particles                     | CMOF                            | PEO          | LiTFSI             | 100    | $3.9 \times 10^{-6}$ | 128 |
| Sun <i>et al.</i>       | April 2019 | $2.3 \times 10^{-6}$ | Inert Particles               | g-C <sub>3</sub> N <sub>4</sub> | PEO          | LiTFSI             | --     | $4.7 \times 10^{-7}$ | 129 |
| Tang <i>et al.</i>      | April 2019 | $1.9 \times 10^{-4}$ | Inert Sheets                  | vermicult<br>e                  | PEO          | LiTFSI             | 1.5    | $7.9 \times 10^{-7}$ | 130 |
| Zagorski <i>et al.</i>  | May 2019   | $3.4 \times 10^{-7}$ | Particles                     | LLZO                            | PEO          | LiTFSI             | 1400   | $1.3 \times 10^{-6}$ | 81  |
| Li <i>et al.</i>        | June 2019  | $7 \times 10^{-6}$   | Particles                     | LSPS                            | PEO          | LiTFSI             | --     | $2.3 \times 10^{-6}$ | 143 |
| Huang <i>et al.</i>     | June 2019  | $1.2 \times 10^{-4}$ | Particles                     | LLZTO                           | PEO          | LiTFSI             | 120    | --                   | 144 |
| *Wang <i>et al.</i>     | June 2019  | $1.7 \times 10^{-4}$ | Nanowalls                     | LAGP                            | PEO          | LiTFSI             | 150000 | $2 \times 10^{-5}$   | 44  |
| Lu <i>et al.</i>        | July 2019  | $8.8 \times 10^{-5}$ | Particles                     | LLZTO                           | PVDF-<br>HFP | LiTFSI             | 250    | $2.8 \times 10^{-6}$ | 96  |
| Li <i>et al.</i>        | July 2019  | $1 \times 10^{-4}$   | 3D Network                    | Ga-<br>LLZO                     | PEO          | LiTFSI             | 20000  | --                   | 88  |
| Pan <i>et al.</i>       | Sept 2019  | $2 \times 10^{-5}$   | Inert Particles               | MXen                            | PEO          | LiTFSI             | 1      | $6.4 \times 10^{-6}$ | 56  |
| Fu <i>et al.</i>        | Oct 2019   | $2.2 \times 10^{-5}$ | Porous<br>Network             | LLZAO                           | PEO          | LiClO <sub>4</sub> | 10000  | $7 \times 10^{-7}$   | 89  |
| *Sivaraj <i>et al.</i>  | Mar 2020   | $2 \times 10^{-3}$   | Particles                     | LLTO                            | PVDF         | LiClO <sub>4</sub> | 10000  | $5.7 \times 10^{-5}$ | 27  |
